# Supplementary material for: Local cloud enhancement in cities depends on urban morphology
Source: Research Square preprint supplement (doi:10.21203/rs.3.rs-6598455/v1), 2025-05-16
Supplement: Supplementary file 1 [file a7647df596b05f674a9f5f14.pdf]

# **Supporting Information for Local cloud enhancement in cities depends on urban morphology**

Yuanfeng Cui<sup>1</sup>, Sisi Chen<sup>2</sup>, Lulin Xue<sup>2</sup>, Domingo Muñoz-Esparza<sup>2</sup>,  
Jeremy A. Sauer<sup>2</sup>, Leiqiu Hu<sup>3</sup>, John D. Albertson<sup>1</sup>, Qi Li<sup>1\*</sup>

<sup>1</sup>School of Civil and Environmental Engineering, Cornell University, NY, 14853, USA.

<sup>2</sup>National Center for Atmospheric Research, Boulder, CO, 80307, USA.

<sup>3</sup>Department of Atmospheric and Earth Science, University of Alabama in Huntsville, AL, 35899, USA.

\*Corresponding author. Email: ql56@cornell.edu

## **Supplementary materials**

Materials and Methods

Figs. S1 to S6

Tables S1 to S2

# **Supplementary Materials for**

## **Supporting Information for Local cloud enhancement in cities**

### **depends on urban morphology**

Yuanfeng Cui<sup>1</sup>, Sisi Chen<sup>2</sup>, Lulin Xue<sup>2</sup>, Domingo Muñoz-Esparza<sup>2</sup>,

Jeremy A. Sauer<sup>2</sup>, Leiqiu Hu<sup>3</sup>, John D. Albertson<sup>1</sup>, Qi Li<sup>1\*</sup>

<sup>1</sup>School of Civil and Environmental Engineering, Cornell University, NY, 14853, USA.

<sup>2</sup>National Center for Atmospheric Research, Boulder, CO, 80307, USA.

<sup>3</sup>Department of Atmospheric and Earth Science, University of Alabama in Huntsville, AL, 35899, USA.

\*Corresponding author. Email: ql56@cornell.edu

#### **This PDF file includes:**

Materials and Methods

Figures S1 to S6

Tables S1 to S2

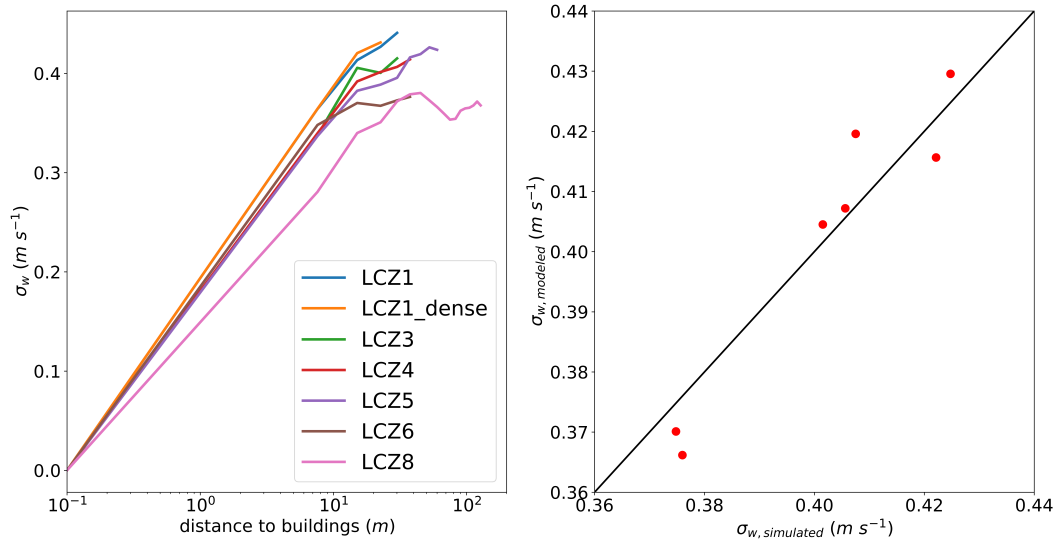

**Figure S1: Simulated results of vertical turbulence and validation of vertical turbulence model.** (left) Magnitude of vertical turbulence with respect to distance to the buildings at  $z = 15$  m for cases with urban canopy.  $\sigma_w$  at a certain distance from the buildings is calculated as the standard deviation of vertical velocity at that distance from the buildings. (right) Comparison of modeled and simulated vertical turbulence at  $z = 15$  m.

## Figures

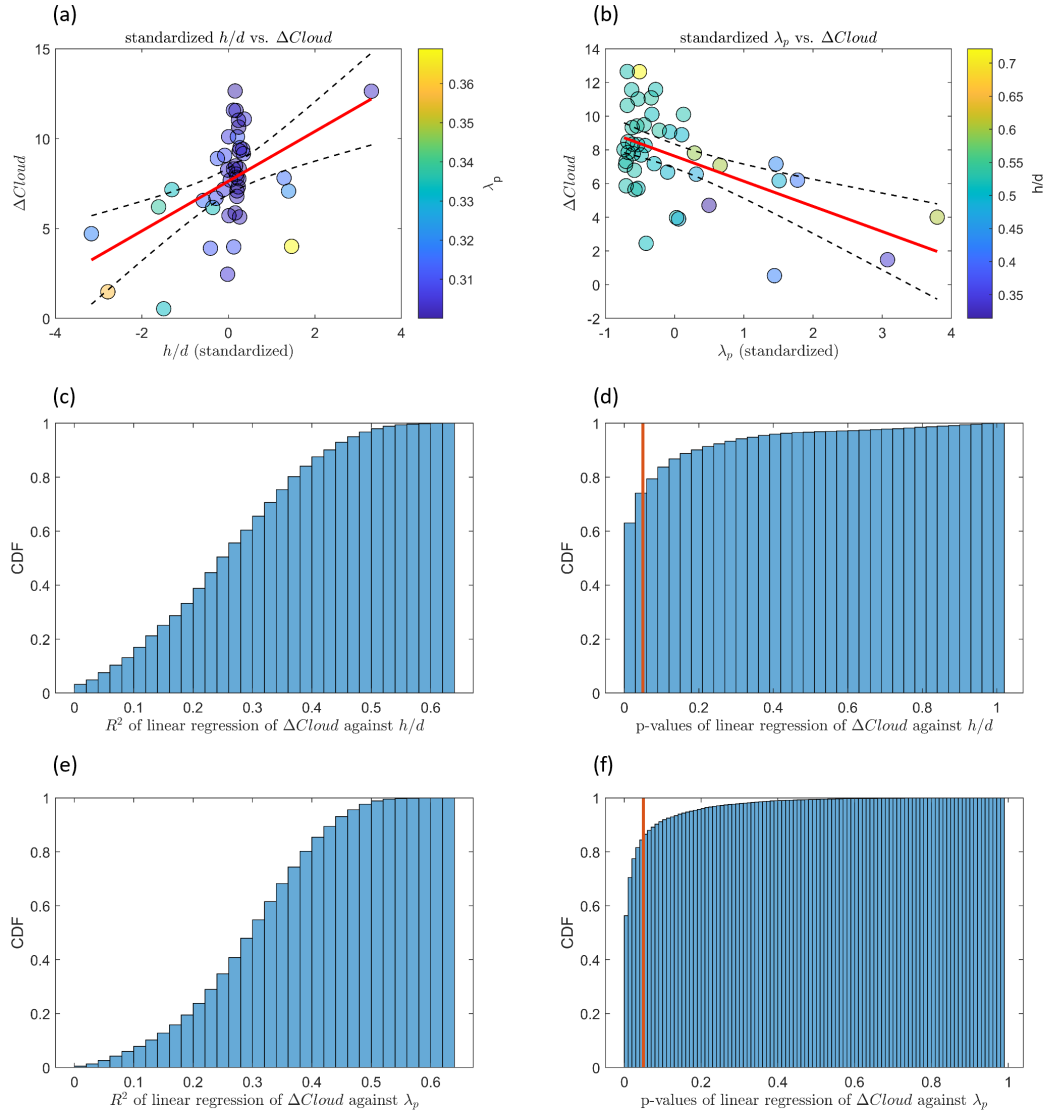

**Figure S2: Nighttime cloud cover discrepancies with respect to urban form parameters across major U.S. cities.** (a)-(b): Observational results of nighttime cloud cover discrepancies between urban and rural areas across 44 major U.S. cities during warm seasons (April to September), with respect to urban form parameters of (a) building density and (b) street-canyon aspect ratio of building height divided by canyon width. Red lines are linear fits of the dataset, (a)  $y = 1.384x + 7.632$ ,  $R^2 = 0.25$ ,  $p = 5.1 \times 10^{-4}$ ; (b)  $y = -1.493x + 7.632$ ,  $R^2 = 0.29$ ,  $p = 1.5 \times 10^{-4}$ . Black dashed lines are confidence intervals at 95%. (c)-(f): Distributions of (left column)  $R^2$  and (right column) p-values of linear regression of cloud cover discrepancies against (upper row)  $h/d$  and (lower row)  $\lambda_p$  in the bootstrap sampling of half of the cities for 10000 times.



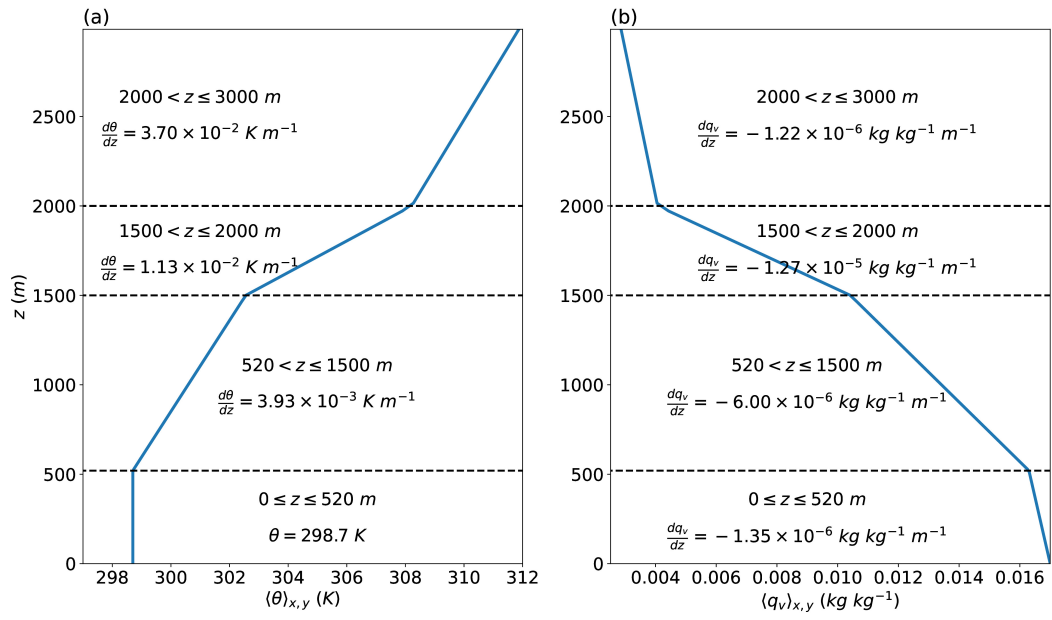

**Figure S3: Initial profiles.** (a) Potential temperature; (b) water vapor mixing ratio.

## Tables

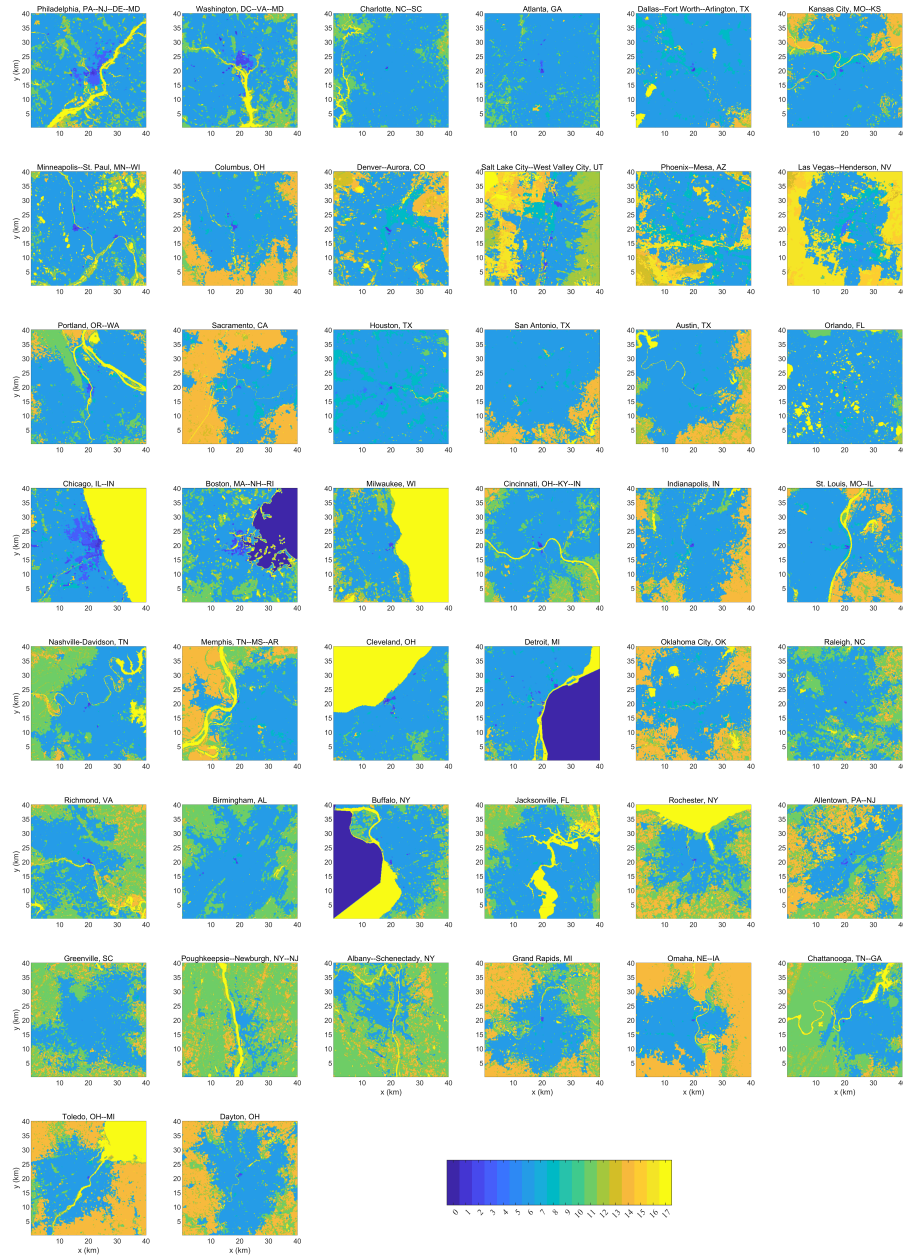

**Figure S4: LCZ maps of all cities in the observation.** LCZ 1: compact highrise; LCZ 2: compact midrise; LCZ 3: compact lowrise; LCZ 4: open highrise; LCZ 5: open midrise; LCZ 6: open lowrise; LCZ 7: lightweight low-rise; LCZ 8: large lowrise; LCZ 9: sparsely built; LCZ 10: heavy industry; LCZ 11: dense trees; LCZ 12: scattered trees; LCZ 13: Bush, scrub; LCZ 14: low plants; LCZ 15: bare rock or paved; LCZ 16: bare soil or sand; LCZ 17: water.

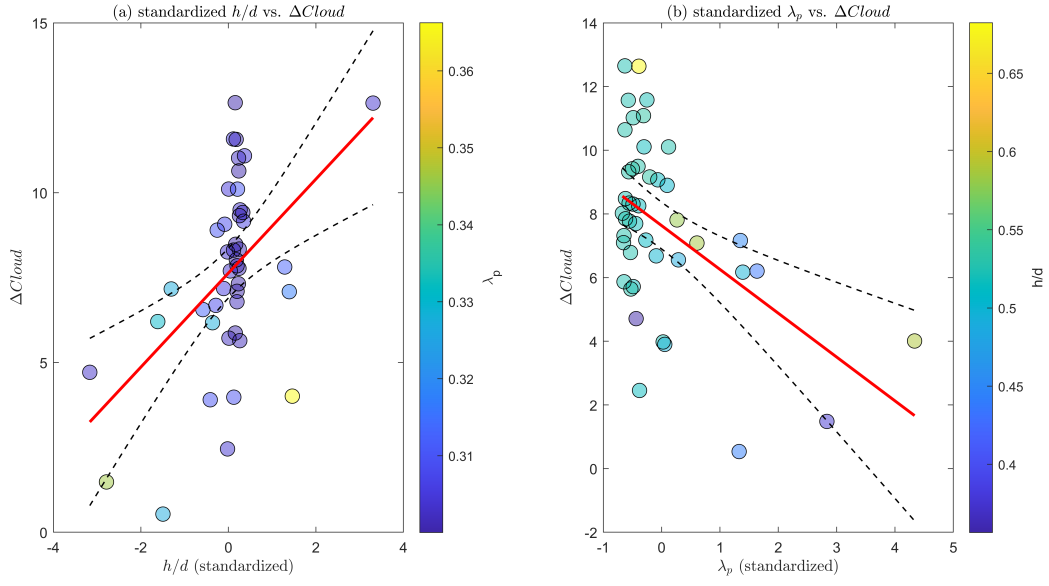

**Figure S5: Observational results of nighttime cloud cover discrepancies between urban and rural areas across 44 major U.S. cities during warm season (April to September), with respect to urban form parameters of (a) aspect ratio of building height divided by canyon width and (b) building density. The size of urban center is taken as 500 km<sup>2</sup>. Red lines are linear fits of the dataset. Black dashed lines are confidence intervals at 95%.**

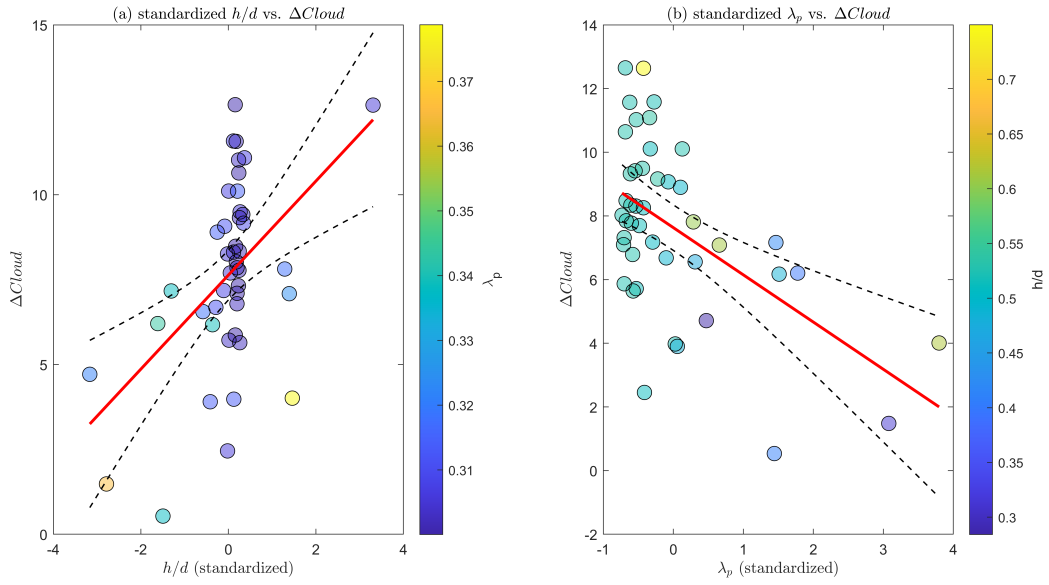

**Figure S6: Same as Figure S5 but the size of urban center is taken as 350 km<sup>2</sup>.**

**Table S1: Partial correlation coefficients and spearman correlation coefficients of the observational dataset.** Partial correlation coefficient  $r_{XY,Z} = \frac{r_{XY} - r_{XZ}r_{YZ}}{\sqrt{(1-r_{XZ}^2)(1-r_{YZ}^2)}}$ ; spearman correlation coefficient  $\rho = 1 - \frac{6\sum d_i^2}{n(n^2+1)}$ , in which  $d_i$  is the rank difference for the  $i$ -th pair of observations and  $n$  is the number of observations.

|                                            |              |
|--------------------------------------------|--------------|
| $r_{h/d, \Delta Cloud, \lambda_p} = 0.40$  | $p = 0.0088$ |
| $r_{\lambda_p, \Delta Cloud, h/d} = -0.45$ | $p = 0.0025$ |
| $\rho_{h/d, \Delta Cloud} = 0.45$          | $p = 0.0024$ |
| $\rho_{\lambda_p, \Delta Cloud} = -0.40$   | $p = 0.0075$ |

**Table S2: List of US cities in the observation.**  $A$ : city size ( $\text{km}^2$ ).

| City                            | Description | $\log_{10}(A \text{ km}^2)$ |
|---------------------------------|-------------|-----------------------------|
| Boston, MA–NH–RI                | coastal     | 4.2200                      |
| Chicago, IL–IN                  | coastal     | 4.0178                      |
| Atlanta, GA                     | inland      | 4.0280                      |
| Philadelphia, PA–NJ–DE–MD       | coastal     | 3.9813                      |
| Detroit, MI                     | coastal     | 3.8955                      |
| Dallas–Fort Worth–Arlington, TX | inland      | 3.8661                      |
| Houston, TX                     | coastal     | 3.7748                      |
| Washington, DC–VA–MD            | coastal     | 3.7537                      |
| Minneapolis–St. Paul, MN–WI     | inland      | 3.7359                      |
| Phoenix–Mesa, AZ                | mountainous | 3.6632                      |
| St. Louis, MO–IL                | inland      | 3.5944                      |
| Cleveland, OH                   | coastal     | 3.5519                      |
| Cincinnati, OH–KY–IN            | inland      | 3.5321                      |
| Denver–Aurora, CO               | mountainous | 3.4936                      |
| Indianapolis, IN                | inland      | 3.4930                      |

|                                     |             |        |
|-------------------------------------|-------------|--------|
| Kansas City, MO–KS                  | inland      | 3.4650 |
| Charlotte, NC–SC                    | inland      | 3.4609 |
| Portland, OR–WA                     | mountainous | 3.4397 |
| Milwaukee, WI                       | coastal     | 3.4241 |
| Columbus, OH                        | inland      | 3.3566 |
| Nashville-Davidson, TN              | inland      | 3.3467 |
| Orlando, FL                         | inland      | 3.3133 |
| San Antonio, TX                     | inland      | 3.3119 |
| Raleigh, NC                         | inland      | 3.3110 |
| Richmond, VA                        | inland      | 3.3072 |
| Sacramento, CA                      | mountainous | 3.3011 |
| Birmingham, AL                      | inland      | 3.2971 |
| Memphis, TN–MS–AR                   | inland      | 3.2853 |
| Buffalo, NY                         | coastal     | 3.2631 |
| Austin, TX                          | inland      | 3.2601 |
| Jacksonville, FL                    | coastal     | 3.2394 |
| Las Vegas–Henderson, NV             | mountainous | 3.2159 |
| Oklahoma City, OK                   | inland      | 3.2058 |
| Rochester, NY                       | coastal     | 3.2018 |
| Allentown, PA–NJ                    | mountainous | 3.1946 |
| Greenville, SC                      | inland      | 3.1924 |
| Poughkeepsie–Newburgh, NY–NJ        | inland      | 3.1852 |
| Dayton, OH                          | inland      | 3.1824 |
| Albany–Schenectady, NY              | mountainous | 3.1545 |
| Grand Rapids, MI                    | coastal     | 3.1357 |
| Omaha, NE–IA                        | inland      | 3.0971 |
| Salt Lake City–West Valley City, UT | mountainous | 3.0956 |
| Chattanooga, TN–GA                  | inland      | 3.0637 |

|               |         |        |
|---------------|---------|--------|
| Toledo, OH–MI | coastal | 3.0472 |
|---------------|---------|--------|
